# Supplementary material for: Click synthesis of novel 6-((1H-1,2,3-triazol-4-yl)methyl)-6H-indolo[2,3-b]quinoxalines for in vitro anticancer evaluation and docking studies
Source: Royal Society of Chemistry journal article supplement (doi:10.1039/d3nj05761e), 2024-01-01
Supplement: d3nj05761e1.pdf [file d3nj05761e1.pdf]

## Click synthesis of novel 6-((1*H*-1,2,3-triazol-4-yl)methyl)-6*H*-indolo[2,3-*b*]quinoxalines for in *vitro* anticancer evaluation and docking studies

**Tamer El Malah,<sup>\*a</sup> Ahmed A. El-Rashedy,<sup>b</sup> Mohamed Ibrahim Hegab<sup>a</sup> Hanem M. Awad<sup>c</sup>  
and Ahmed Hussien Shamroukh<sup>a</sup>**

<sup>a</sup>*Photochemistry Department, Chemical Industries Research Institute, National Research Centre, 33 El Buhouth Street, P.O. Box 12622, Cairo, Egypt*

<sup>b</sup>*Natural and Microbial Products Department, National Research Center, Egypt*

<sup>c</sup>*Department of Tanning Materials and Leather Technology, National Research Centre, 33 El Buhouth Street, P.O. Box 12311, Cairo, Egypt.*

\* CONTACT Tamer El Malah  tmara\_nrc3000@yahoo.com  Photochemistry Department, Chemical Industries Research Institute, National Research Centre, 33 El Buhouth Street, P.O. Box 12622, Cairo, Egypt

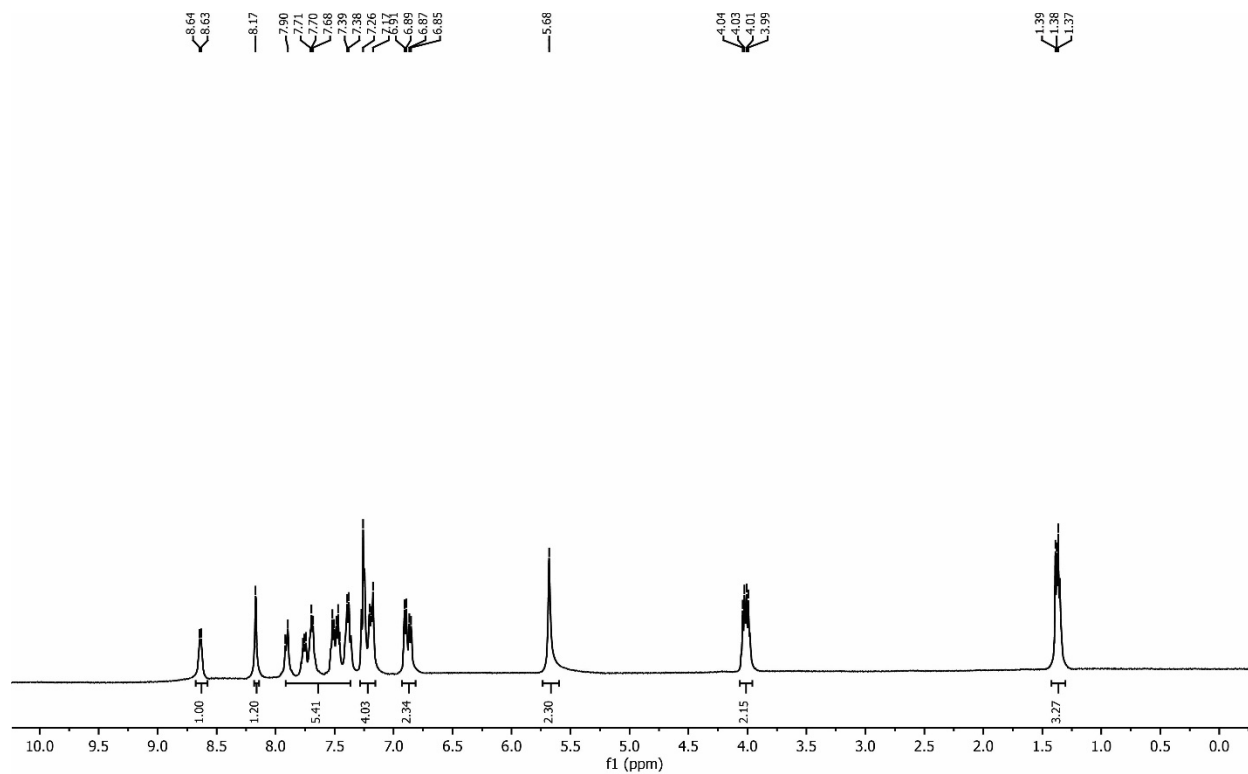

**Figure S1.**  $^1\text{H}$  NMR spectrum of compound **24** ( $\text{CDCl}_3$ , 400 MHz, 298 K).

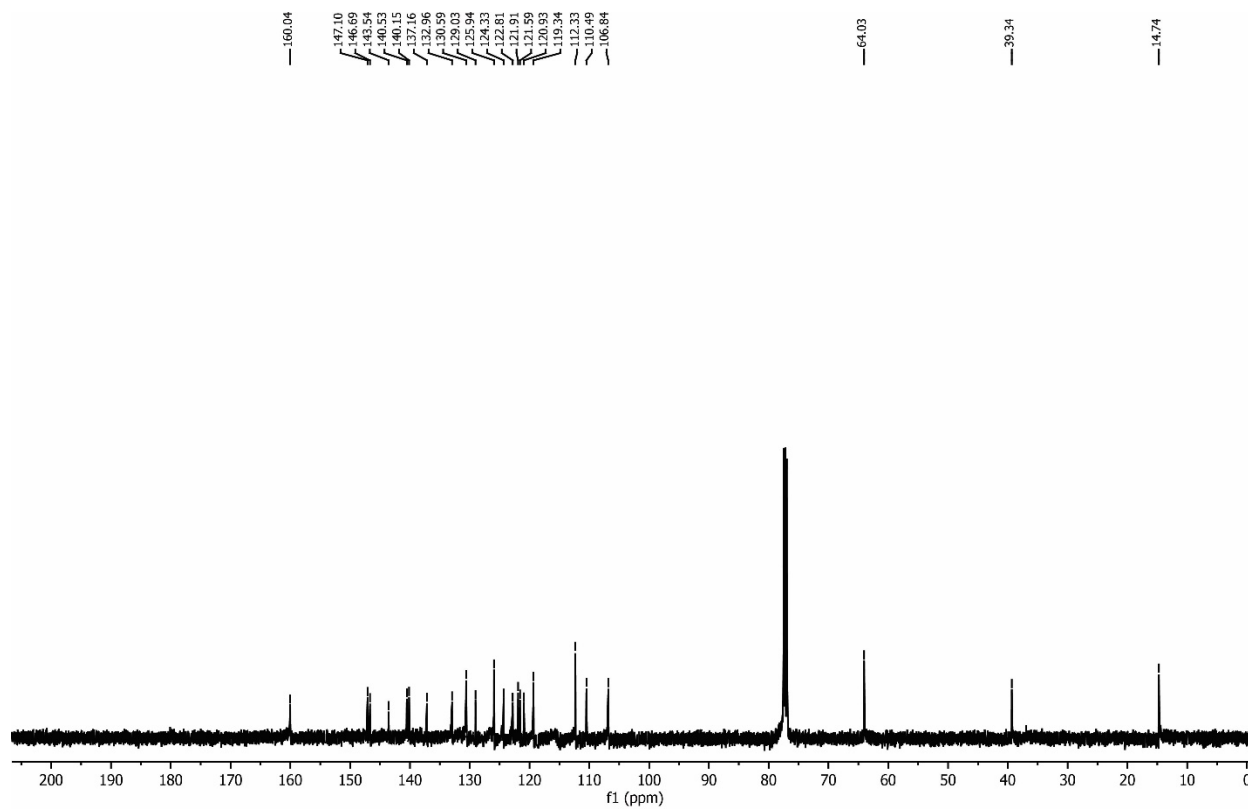

**Figure S2.**  $^{13}\text{C}$  NMR spectrum of compound **24** ( $\text{CDCl}_3$ , 100 MHz, 298 K).

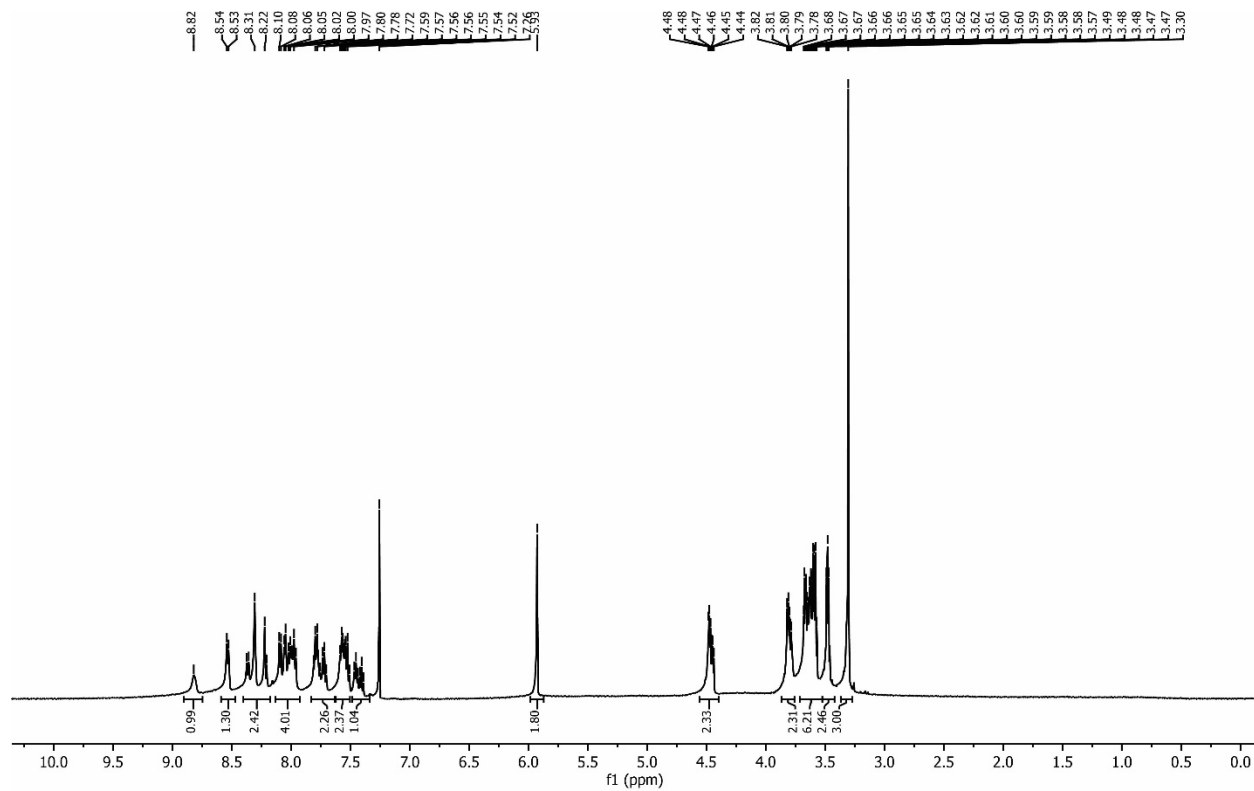

Figure S3.  $^1\text{H}$  NMR spectrum of compound **25** ( $\text{CDCl}_3$ , 400 MHz, 298 K).

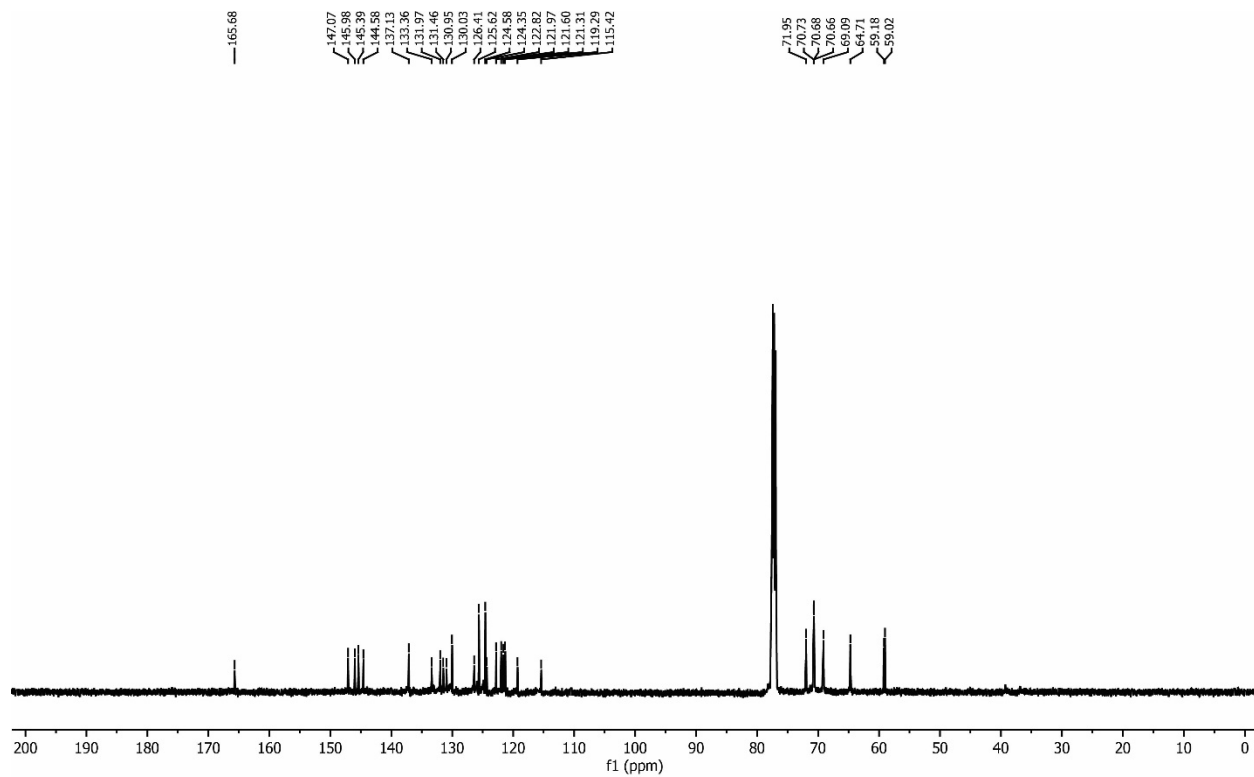

Figure S4.  $^{13}\text{C}$  NMR spectrum of compound **25** ( $\text{CDCl}_3$ , 100 MHz, 298 K).

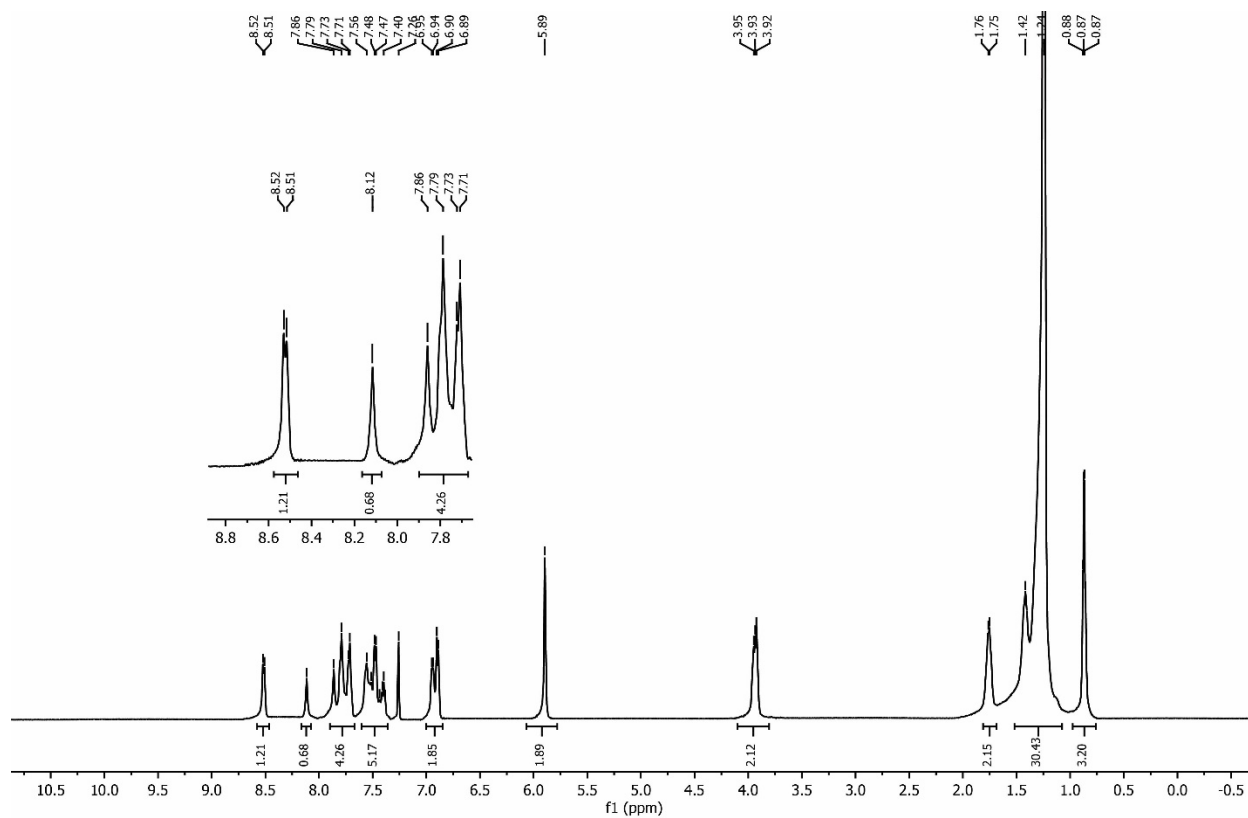

**Figure S5.**  $^1\text{H}$  NMR spectrum of compound **26** ( $\text{CDCl}_3$ , 400 MHz, 298 K).

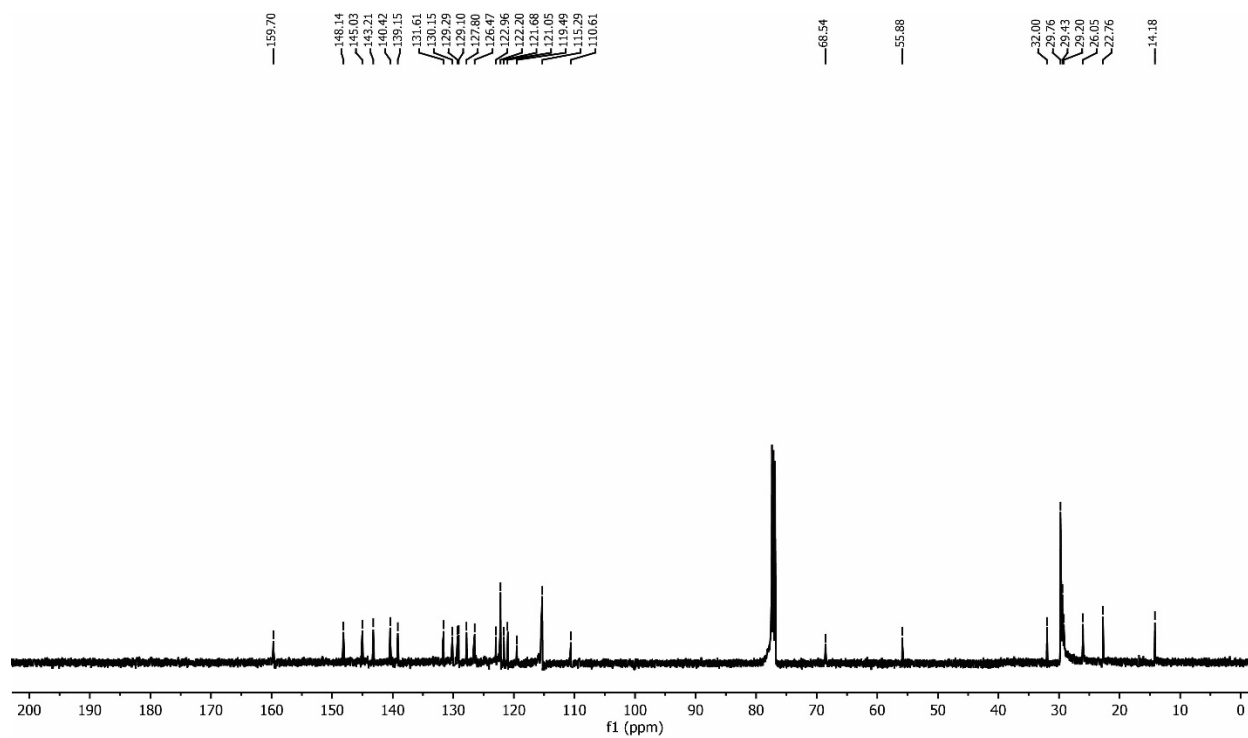

**Figure S6.**  $^{13}\text{C}$  NMR spectrum of compound **26** ( $\text{CDCl}_3$ , 100 MHz, 298 K).

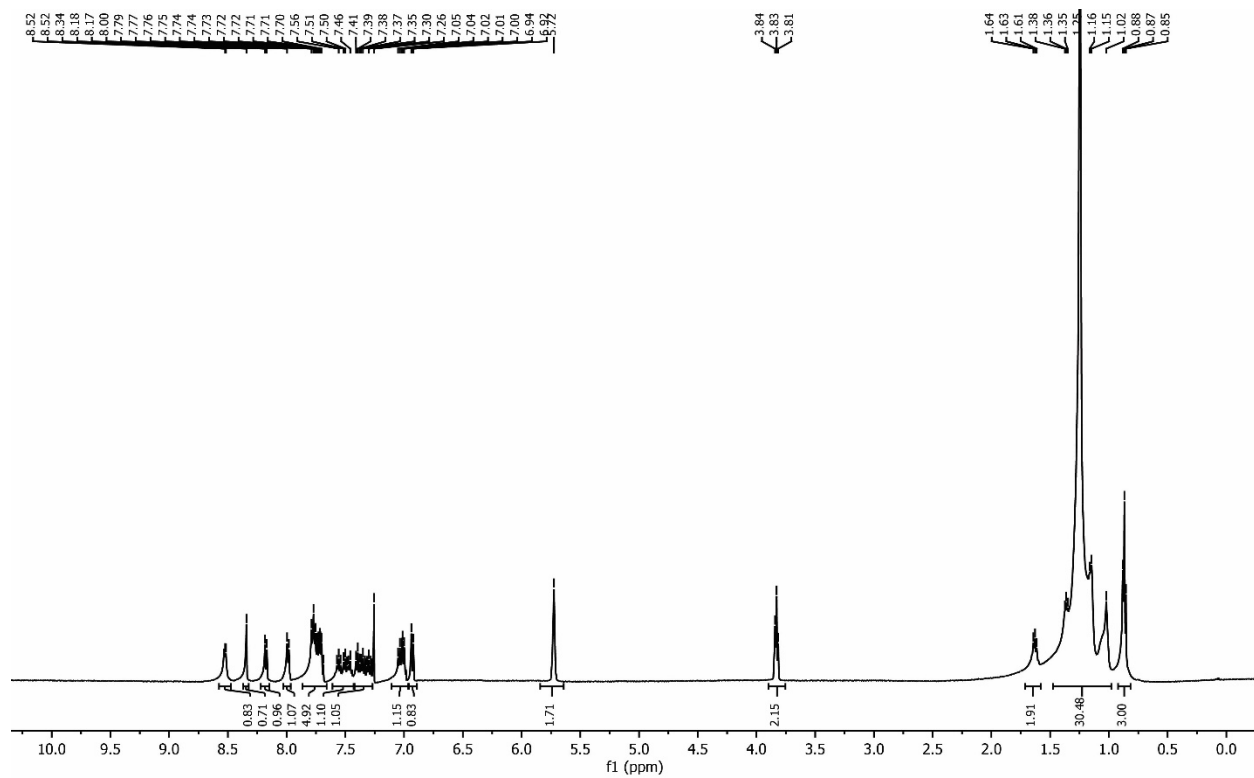

Figure S7.  $^1\text{H}$  NMR spectrum of compound **27** ( $\text{CDCl}_3$ , 400 MHz, 298 K).

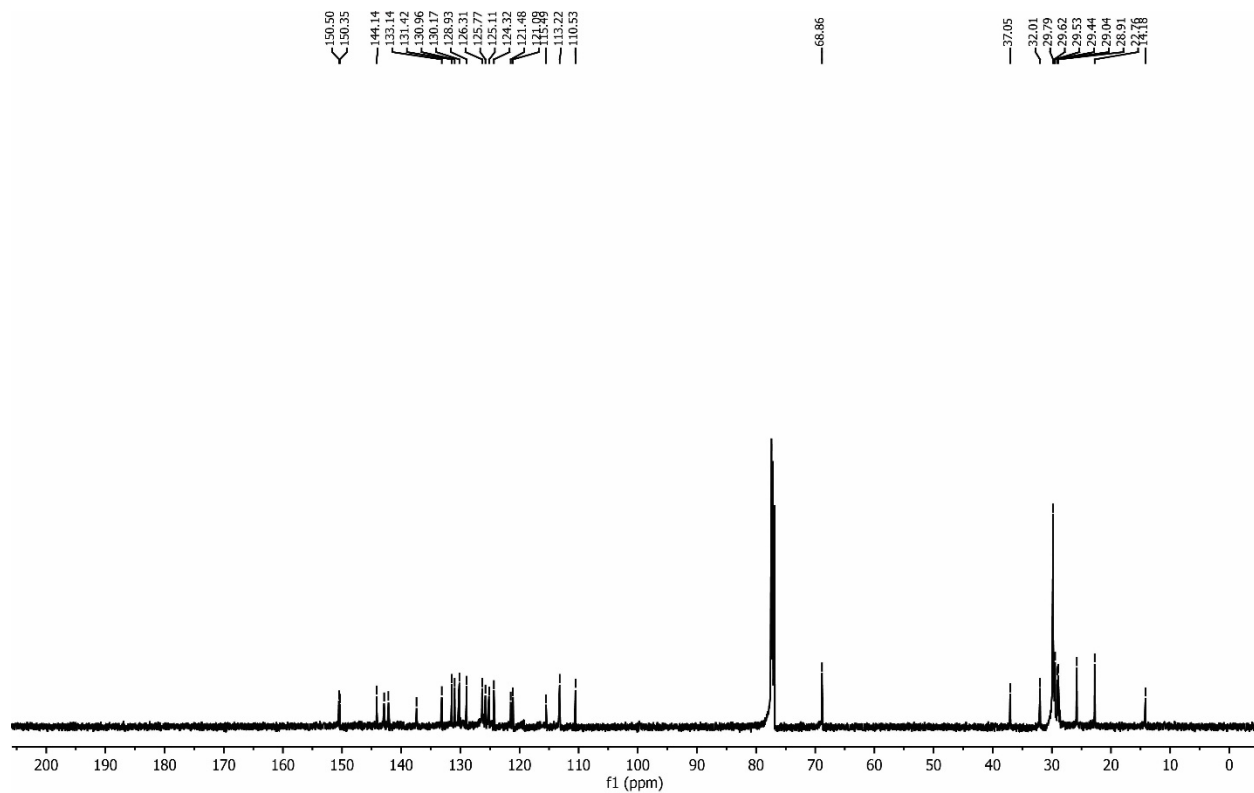

Figure S8.  $^{13}\text{C}$  NMR spectrum of compound **27** ( $\text{CDCl}_3$ , 100 MHz, 298 K).

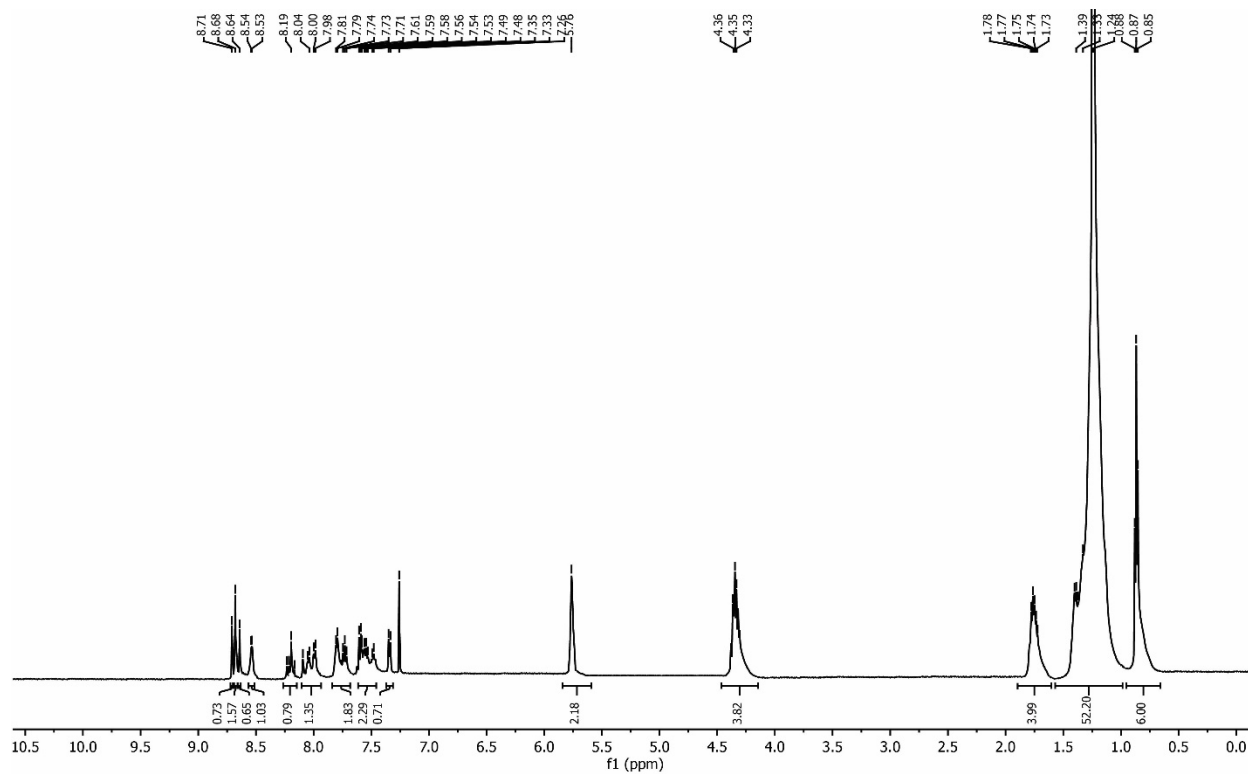

**Figure S9.**  $^1\text{H}$  NMR spectrum of compound **28** ( $\text{CDCl}_3$ , 400 MHz, 298 K).

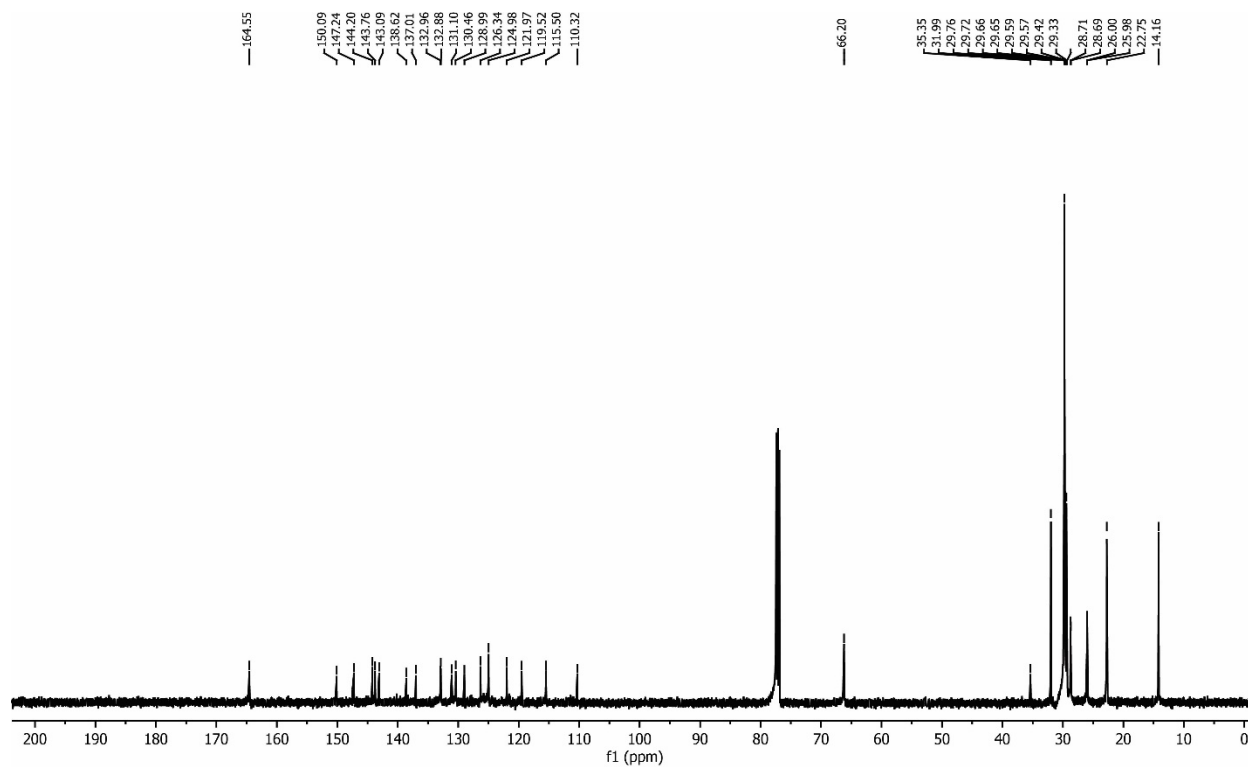

**Figure S10.**  $^{13}\text{C}$  NMR spectrum of compound **28** ( $\text{CDCl}_3$ , 100 MHz, 298 K).

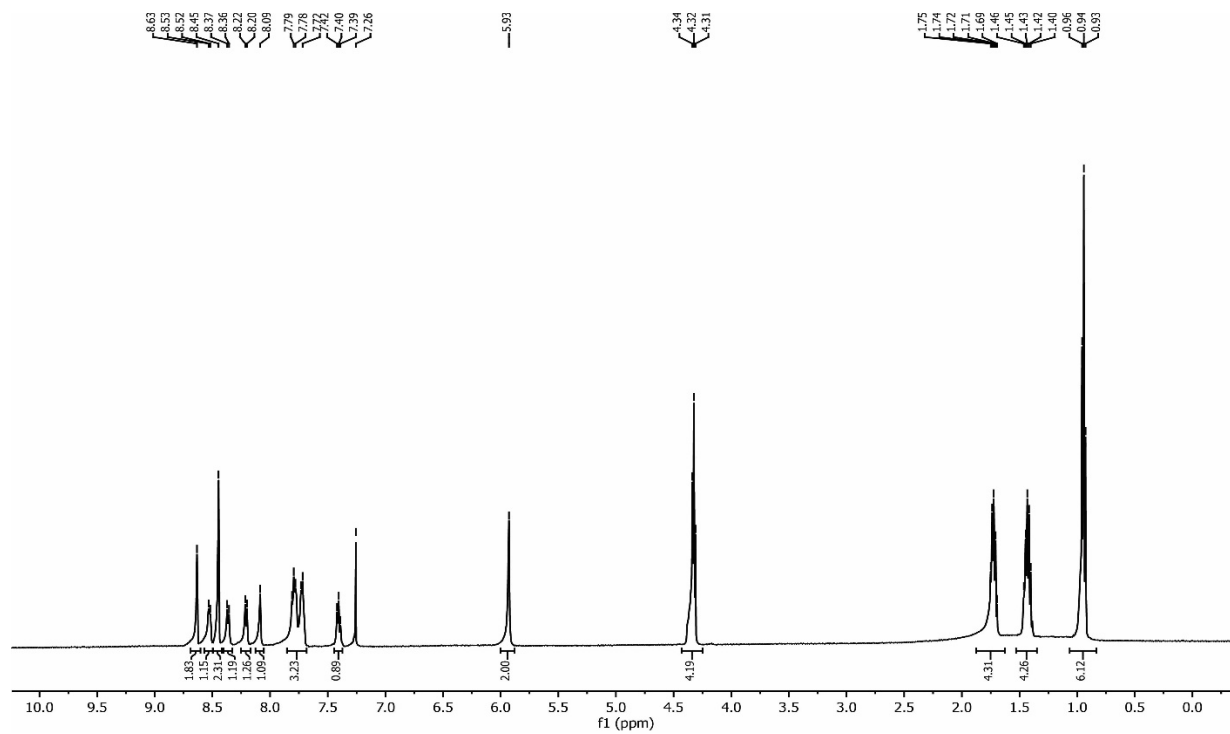

Figure S11.  $^1\text{H}$  NMR spectrum of compound **29** ( $\text{CDCl}_3$ , 400 MHz, 298 K).

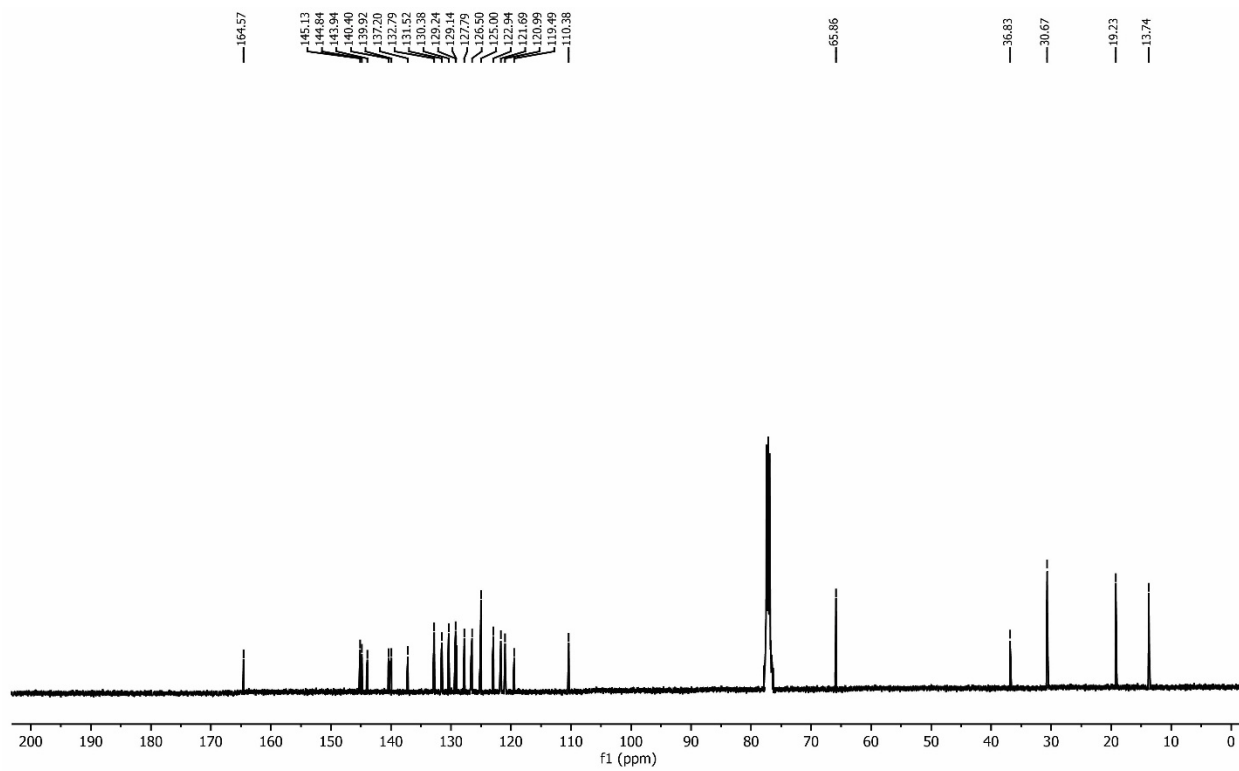

Figure S12.  $^{13}\text{C}$  NMR spectrum of compound **29** ( $\text{CDCl}_3$ , 100 MHz, 298 K).
